# Supplementary material for: COVID-19 Clusters in Belgian Nursing Homes: Impact of Facility Characteristics and Vaccination on Cluster Occurrence, Duration and Severity
Source: MDPI journal article supplement (doi:10.3390/v15010232), 2023-01-13
Supplement: s1 [file s1]

**Supplementary Table S2.** Univariate negative binomial regression of factors influencing the cluster characteristics (size, hospital admissions, deaths, duration) (negative binomial regression) for the period from June 22, 2020 to January 2, 2022, Belgium.

|                                | Cases                                     | Hospital admissions                       | Deaths                                    | Duration of clusters (days)                |
|--------------------------------|-------------------------------------------|-------------------------------------------|-------------------------------------------|--------------------------------------------|
|                                | Estimate<br>(Wald 95% CI)                 | Estimate<br>(Wald 95% CI)                 | Estimate<br>(Wald 95% CI)                 | Estimate<br>(Wald 95% CI)                  |
| Ownership                      |                                           |                                           |                                           |                                            |
| <i>Public</i>                  | Ref.                                      | Ref.                                      | Ref.                                      | Ref.                                       |
| <i>Private nonprofit</i>       | -0.003<br>(-0.11 – 0.11)                  | -0.15<br>(-0.34 – -0.04)                  | 0.13<br>(-0.06 – 0.31)                    | <b>-0.05**</b><br><b>(-0.11 – -0.001)</b>  |
| <i>Private for-profit</i>      | -0.10*<br>(-0.22 – 0.02)                  | -0.13<br>(-0.32 – 0.07)                   | <b>-0.39***</b><br><b>(-0.58 – -0.19)</b> | <b>-0.06 **</b><br><b>(-0.11 – -0.004)</b> |
| Size                           |                                           |                                           |                                           |                                            |
| <i>Small</i>                   | <b>-0.15**</b><br><b>(-0.24 – -0.06)</b>  | -0.05<br>(-0.20 – 0.11)                   | -0.08<br>(-0.24 – 0.07)                   | <b>-0.10***</b><br><b>(-0.14 – -0.05)</b>  |
| <i>Large</i>                   | Ref.                                      | Ref.                                      | Ref.                                      | Ref.                                       |
| Region                         |                                           |                                           |                                           |                                            |
| <i>Flanders</i>                | Ref.                                      | Ref.                                      | Ref.                                      | Ref.                                       |
| <i>Brussels</i>                | <b>-0.004**</b><br><b>(-0.42 – -0.11)</b> | <b>0.25**</b><br><b>(0.08 – 0.41)</b>     | <b>-0.80***</b><br><b>(-1.07 – -0.54)</b> | -0.04<br>(-0.11 – 0.04)                    |
| <i>Wallonia</i>                | -0.26<br>(-0.42 – -0.11)                  | <b>-0.34**</b><br><b>(-0.61 – -0.06)</b>  | <b>-0.74***</b><br><b>(-0.90 – -0.58)</b> | -0.04<br>(-0.05 – 0.04)                    |
| Wave                           |                                           |                                           |                                           |                                            |
| <i>Interwave 1</i>             | Ref.                                      | Ref.                                      | Ref.                                      | Ref.                                       |
| <i>2<sup>nd</sup> wave</i>     | <b>1.37***</b><br><b>(1.12 – 1.62)</b>    | <b>0.98***</b><br><b>(0.53 – 1.42)</b>    | <b>1.42***</b><br><b>(0.99 – 1.85)</b>    | <b>0.45***</b><br><b>(0.33 – 0.58)</b>     |
| <i>3<sup>th</sup> wave</i>     | 0.18<br>(-0.11 – 0.47)                    | -0.41<br>(-0.93 – 0.12)                   | -0.48*<br>(-0.99 – 0.03)                  | <b>0.20**</b><br><b>(0.05 – 0.34)</b>      |
| <i>Interwave 2</i>             | <b>0.38**</b><br><b>(0.07 – 0.68)</b>     | -0.40<br>(-0.95 – 0.16)                   | <b>-0.61**</b><br><b>(-1.16 – -0.06)</b>  | <b>0.41***</b><br><b>(0.25 – 0.56)</b>     |
| <i>4<sup>th</sup> wave</i>     | <b>0.35**</b><br><b>(0.08 – 0.62)</b>     | -0.41*<br>(0.88 – 0.07)                   | <b>-0.61**</b><br><b>(-1.16 – -0.06)</b>  | <b>0.39***</b><br><b>(0.26 – 0.52)</b>     |
| <i>5<sup>th</sup> wave</i>     | <b>0.97***</b><br><b>(0.60 – 1.35)</b>    | <b>-1.32**</b><br><b>(-2.17 – -0.48)</b>  | <b>-1.59***</b><br><b>(-2.47 – -0.71)</b> | <b>0.72***</b><br><b>(0.53 – 0.91)</b>     |
| Previous cluster               |                                           |                                           |                                           |                                            |
| <i>No</i>                      | Ref.                                      | Ref.                                      | Ref.                                      | Ref.                                       |
| <i>Yes</i>                     | <b>-0.39***</b><br><b>(0.53 – -0.26)</b>  | <b>-0.54***</b><br><b>(-0.76 – -0.32)</b> | <b>-0.40***</b><br><b>(-0.63 – -0.18)</b> | -0.06*<br>(-0.12 – 0.005)                  |
| Start vaccination              |                                           |                                           |                                           |                                            |
| <i>Vaccination not started</i> | Ref.                                      | Ref.                                      | Ref.                                      | Ref.                                       |
| <i>First dose given</i>        | <b>-0.59***</b><br><b>(-0.79 – -0.38)</b> | <b>-0.87***</b><br><b>(-1.23 – -0.50)</b> | <b>-0.70***</b><br><b>(-1.02 – -0.36)</b> | <b>-0.19***</b><br><b>(-0.30 – -0.09)</b>  |
| <i>Second dose given</i>       | <b>-0.95***</b><br><b>(-1.04 – -0.86)</b> | <b>-1.37***</b><br><b>(-1.54 – -1.20)</b> | <b>-1.96***</b><br><b>(-2.13 – -1.79)</b> | -0.06<br>(-0.10 – -0.01)                   |

\*P<0.1, \*\*P<0.05, \*\*\*P<0.001
